# Supplementary material for: APA-Scan: detection and visualization of 3′-UTR alternative polyadenylation with RNA-seq and 3′-end-seq data
Source: PubMed Central journal article supplement (PMC9520800; doi:10.1186/s12859-022-04939-w), 2022-09-28

# APA-Scan User Manual

## 1 About

APA-Scan is a computational tool which can detect and visualize genome-wide 3'-UTR APA events. APA-Scan integrates both 3'-end-seq (an RNA-seq method with a specific enrichment of 3'-ends of mRNA) data and the location information of predicted canonical PASs with RNA-seq data to improve the quantitative definition of genome-wide UTR-APA events. It is also advantageous in producing high quality plots of the user defined events.

## 2 Download

APA-Scan is downloadable directly from <https://github.com/compbioLabUCF/APA-Scan>. Users need to have python (version 3.0 or higher) installed in their machine to run APA-Scan.

## 3 Required Softwares

1. Python (version 3.0 or higher)
2. Samtools 0.1.8\* [This specific version]

### Required python packages

1. Pandas: \$ pip install pandas
2. Bio: \$ pip install biopython
3. Scipy: \$ pip install scipy
4. Numpy: \$ pip install numpy
5. Peakutils: \$ pip install PeakUtils

## 4 Run APA-Scan

APA-Scan can handle both human and mouse data for detecting potential APA truncation sites. The tool is designed to follow the format of Refseq annotation and genome file from UCSC Genome Browser. Users need to have the following two files in the parent directory in order to run APA-Scan:

1. Refseq annotation (.txt format)
2. Genome fasta file (downloaded from UCSC genome browser)

### 4.1 Required files

APA-Scan has two python scripts: **APA-Scan.py**, **Make-Plots.py**  
And 1 configuration file: **configuration.ini**

The configuration file allows the user to specify the directories of the input samples, the species to be analyzed and the directory where all output files will be stored.

APA-Scan supports the analysis of multiple samples that belong to two different groups- all BAM files inside the input1 directory will be considered as part of the first group, and all BAM files inside

the input2 directory will be considered as part of the second group. It is required to have at least one BAM file in each input directory.

## 4.2 Running with parameters in the configuration.ini file

(\* refers to a mandatory field)

|               |                                                                                                                                                                                                                               |
|---------------|-------------------------------------------------------------------------------------------------------------------------------------------------------------------------------------------------------------------------------|
| species*:     | Species name (human/mouse)                                                                                                                                                                                                    |
| input1* :     | Directory containing the first group of samples with RNA-seq data [must be a folder name without '/' at the end]                                                                                                              |
| input2* :     | Directory containing the second group of samples with RNA-seq data[must be a folder name without '/' at the end]                                                                                                              |
| pas1* :       | Directory containing the first group of samples with 3'-end-seq data [must be a folder name without '/' at the end]. Default is NULL                                                                                          |
| pas2* :       | Directory containing the second group of samples with 3'-end-seq data [must be a folder name without '/' at the end]. Default is NULL                                                                                         |
| extended* :   | APA-Scan will run on 'Extended 3UTR' mode and it will search for APA sites upto 10kb downstream of the annotated transcript. Value: yes or no                                                                                 |
| All* :        | If selected 'yes', APA-Scan will report all the candidate cleavage sites of a gene, whether they are significant or not. Otherwise, APA-Scan will report the most significant event for each gene [default]. Value: yes or no |
| annotation* : | RefSeq annotation file, downloaded from UCSC Genome Browser, in .txt format                                                                                                                                                   |
| genome* :     | Genome fasta file, in .fa format                                                                                                                                                                                              |
| output_dir :  | Output directory for writing the results. [optional]                                                                                                                                                                          |

An example of the configuration.ini file is provided below:

```
[INPUT_RNAseq]
# Input folder names
# All samples(names like sample1_1.bam, sample1_2.bam....) in group1 must be inside of one folder
# All samples(names like sample1_1.bam, sample2_2.bam....) in group2 must be inside of one folder
input1 = /home/input/Group1
input2 = /home/input/Group2

[INPUT_PASseq]
# All samples(names like sample1_1.bam, sample1_2.bam....) in group1 must be inside of one folder
# All samples(names like sample1_1.bam, sample2_2.bam....) in group2 must be inside of one folder
# Default is NULL
pas1 = NULL
pas2 = NULL

[ANNOTATION]
# Put annotation and genome information
annotation = annotation.txt
genome = genome.fa

[Extended_3UTR]
# Run APA-Scan on 'Extended-3UTR' mode
# Value: yes/no. Default is no
extended = no

[All_events]
All = no

[OUTPUT_FOLDER]
output_dir = /home/output_dirname
```

Once the parameters have been specified in the configuration file, the user will open a terminal and enter the following command to run APA-Scan:

```
$ python3 APA-Scan.py
```

APA-Scan.py will generate several intermediary files in the output directory. After computing the significance of the association between the two groups of samples, the final results will be writ-

ten in the file named **Group1\_Vs\_Group2.csv**. The following image shows some of the generated fields in **Group1\_Vs\_Group2.csv**:

| Chrom | Gene Name | Strand | Start     | End       | Position  | p-value  | Ratio Difference | Absolute ratio difference |
|-------|-----------|--------|-----------|-----------|-----------|----------|------------------|---------------------------|
| chr19 | RPL13A    | +      | 49491728  | 49492307  | 49491826  | 1.92E-42 | -0.065610766     | 0.065610766               |
| chr10 | VIM       | +      | 17237229  | 17237597  | 17237318  | 4.61E-31 | 0.028446051      | 0.028446051               |
| chr17 | RPL26     | -      | 8377515   | 8377692   | 8377564   | 2.98E-26 | -0.04344075      | 0.04344075                |
| chr5  | STC2      | -      | 173314722 | 173318249 | 173317376 | 2.33E-22 | 0.112542951      | 0.112542951               |
| chr17 | RPL19     | +      | 39204524  | 39204730  | 39204650  | 1.03E-21 | -0.049312569     | 0.049312569               |
| chr13 | CDC16     | +      | 114272183 | 114272726 | 114272209 | 4.05E-17 | -0.195062219     | 0.195062219               |
| chr7  | HNRNPA2B1 | -      | 26189935  | 26192577  | 26191861  | 5.11E-16 | -0.061955041     | 0.061955041               |
| chr9  | RABL6     | +      | 136833719 | 136834476 | 136834327 | 5.68E-15 | -0.30708408      | 0.30708408                |
| chrX  | RPS4X     | -      | 72272602  | 72272772  | 72272628  | 2.08E-14 | 0.041582181      | 0.041582181               |
| chr1  | STMN1     | -      | 25900115  | 25901087  | 25900534  | 2.9E-14  | 0.043951567      | 0.043951567               |
| chr17 | RPAIN     | +      | 5432541   | 5433020   | 5432863   | 3.79E-14 | 0.061525048      | 0.061525048               |
| chr6  | SOD2      | -      | 159679063 | 159682638 | 159682113 | 8.77E-14 | -0.076980538     | 0.076980538               |
| chr11 | CCDC84    | +      | 119015537 | 119015792 | 119015726 | 2.19E-12 | -0.057536734     | 0.057536734               |
| chr1  | SYNC      | -      | 32679905  | 32681860  | 32680315  | 4.57E-12 | 0.095614951      | 0.095614951               |
| chr1  | RPS8      | +      | 44778575  | 44778740  | 44778687  | 1.21E-11 | 0.037494068      | 0.037494068               |
| chr8  | SFRP1     | -      | 41261956  | 41265489  | 41265472  | 5.35E-11 | -0.292512141     | 0.292512141               |
| chr15 | TPM1      | +      | 63069869  | 63071914  | 63069945  | 5.54E-11 | 0.075237838      | 0.075237838               |
| chr1  | MEF2D     | -      | 156463720 | 156467656 | 156467650 | 1.5E-10  | -0.282933192     | 0.282933192               |
| chr5  | PHYKPL    | -      | 178208473 | 178211970 | 178211572 | 3.28E-10 | 0.079757735      | 0.079757735               |
| chr2  | RPL37A    | +      | 216501340 | 216501465 | 216501446 | 3.91E-10 | 0.019741659      | 0.019741659               |
| chr12 | PRIM1     | -      | 56731579  | 56731734  | 56731638  | 8.48E-10 | 0.190879674      | 0.190879674               |
| chr18 | RMC1      | +      | 23531624  | 23531807  | 23531765  | 9.45E-10 | -0.13019906      | 0.13019906                |

## 5 Run Make-plots.py

Make-plots.py also requires the same configuration file to run. It will use the input and output directories listed in the configuration file and prepare a read coverage plot along with the 3'-UTR annotation based on user defined region.

### python3 Make-plots.py

After executing this command above for a few seconds, Make-plots.py will ask the user to insert the region of interest in a specific format:

**Chrom:GeneName:RegionStart-RegionEnd**

### 5.1 Make-plots.py parameter descriptions

|             |                                 |
|-------------|---------------------------------|
| Chrom       | Name of the chromosome          |
| GeneName    | Name of the gene                |
| RegionStart | Starting position of the region |
| Region End  | End position of the region      |

Example: **chr1:Tceb1:16641724-16643478**

Make-Plots.py will generate a visual representation of the results shown for each of the regions entered. The plot will illustrate the most significant transcript cleavage site with a red vertical bar on top of RNA-seq read data (and 3'end-seq if available). If the input parameters have 3'end-seq information along with the RNA-seq, then it will generate plots for both cases (See figure below). It will also show the UTR truncation point (annotated and unannotated) at the bottom panel.

The first two subplots of the figure represent the read coverage of the two biological conditions. The bottom subplot shows the gene annotation and the exon information of that gene.

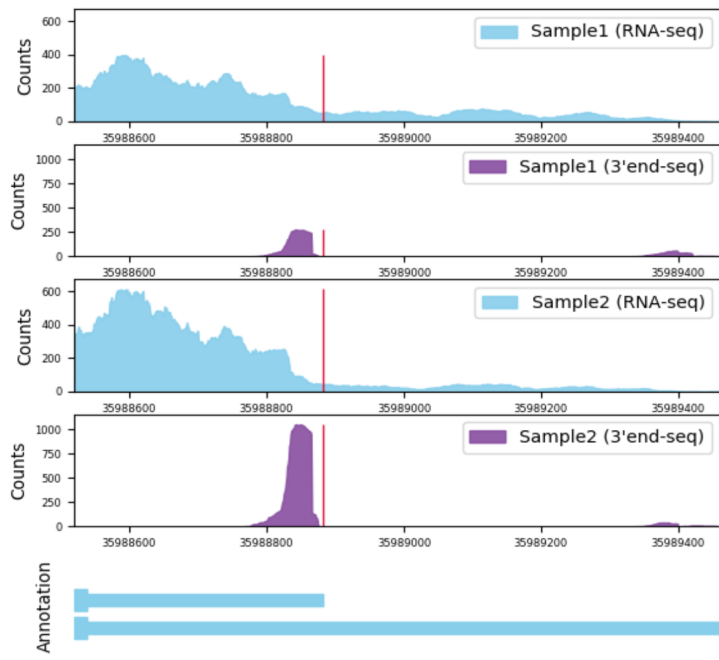

Supplement: 12859_2022_4939_MOESM2_ESM.pdf [file 12859_2022_4939_MOESM2_ESM.pdf]
